# Supplementary material for: Health Risk Awareness Scale of Food Shoppers on Digital Shopping Platforms: A Validation Study
Source: Research Square preprint supplement (doi:10.21203/rs.3.rs-6959514/v1), 2025-07-28
Supplement: Supplementary file 1 [file ca822759213515ffdc834052.docx]

**INFORMED CONSENT FORM**

**Title of the Study**: Health Risk Awareness Scale of Food Shoppers from Digital Shopping Platforms

**Corresponding**: Prof. Dr. Yusuf Çelik, Acıbadem University, Faculty of Health Sciences, Department of Health Management

**1. Purpose of the Study**

The primary objective of this study is to assess the level of health risk awareness among individuals who purchase food through digital shopping platforms and to develop a valid and reliable measurement tool (scale) for this purpose. The study seeks to understand participants' knowledge, perceptions, and attitudes regarding potential health risks associated with online food shopping. The findings aim to contribute to public health protection, increase consumer awareness, and support food safety policy development on digital platforms.

**2. Scope and Procedure of the Study**

This is a quantitative research study. Data will be collected via an online survey form consisting of demographic questions and items related to the health risk awareness scale. Completing the survey will take approximately 10–15 minutes. There will be no physical or psychological interventions applied to participants during the study.

**3. Voluntary Participation**

Participation in this study is entirely voluntary. You have the right to withdraw from the study at any time without providing any justification. Declining to participate or choosing to withdraw will not result in any negative consequences or loss of rights.

**4. Potential Risks and Benefits**

There are no foreseeable physical, psychological, social, or economic risks associated with participating in this study. Participants will not receive any direct monetary benefit. However, their participation may help increase awareness of health-related risks in digital food shopping and contribute to the improvement of consumer consciousness and public health strategies.

**5. Confidentiality and Data Protection**

All data collected in this study will be recorded anonymously and used solely for scientific research purposes. No personally identifiable information, such as name, contact details, or IP address, will be collected. The data will be stored securely and encrypted, accessible only to the research team. Data protection will be ensured in accordance with the Turkish Personal Data Protection Law (Law No. 6698) and the EU General Data Protection Regulation (GDPR). After the analysis is completed, the data will be securely destroyed.

**6. Participants’ Rights**

• You are free to decide whether or not to participate in this research.

• You may withdraw from the study at any point without any penalty or loss of rights.

• You have the right to request that your data be kept confidential and used in accordance with research ethics.

• You have the right to request information about the research process and its results.

7. Contact Information

If you have any questions or need further information about the study, please contact the principal investigator at:

Prof. Dr. Yusuf Çelik

Acıbadem University, Faculty of Health Sciences, Department of Health Management

[Yusuf.celik@acibadem.edu.tr](mailto:Yusuf.celik@acibadem.edu.tr)

+90 535 726 92 87

**VOLUNTEER CONFIRMATION**

I, the undersigned, understand that I have been adequately informed about the research described above, that participation is voluntary, and that I can leave the study at any time I wish. I agree to participate in the research of my own free will.

Name, Surname: ...............................................................

Signature: ......................................................................

Date: ...... / ...... / 2025

| **Weight Control and Quick Access** | **1** | **2** | **3** | **4** | **5** |
| --- | --- | --- | --- | --- | --- |
| E-food shopping makes it difficult to control my weight |  |  |  |  |  |
| E-food shopping causes me to consume more portions than necessary. |  |  |  |  |  |
| Thanks to e-food shopping, I can easily arrange the number of meals I want. |  |  |  |  |  |
| E-food platforms offer options for vegetarians.. |  |  |  |  |  |
| E-food platforms facilitate access to healthy food. |  |  |  |  |  |
| E-food shopping offers a diverse range of menu choices for families, ensuring variety at the table. |  |  |  |  |  |
| Digital food shopping makes life easier. |  |  |  |  |  |
| **General Health Status/Well-Being** | **1** | **2** | **3** | **4** | **5** |
| E-food shopping limits my physical activity |  |  |  |  |  |
| E-food shopping negatively affects my overall health in the long run |  |  |  |  |  |
| E-food shopping has a positive impact on my psychological well-being. |  |  |  |  |  |
| E-food shopping makes me as happy as physical shopping. |  |  |  |  |  |
| E-food shopping satisfies me emotionally as much as physical shopping. |  |  |  |  |  |
| E-food shopping negatively affects my social well-being. |  |  |  |  |  |
| Platforms that provide e-food shopping psychologically compel shopping. |  |  |  |  |  |
| **Hygiene/Food Safety/Product Knowledge** | **1** | **2** | **3** | **4** | **5** |
| The food I buy online is prepared under healthy conditions. |  |  |  |  |  |
| Hygiene is observed in the packaging of food I buy online. |  |  |  |  |  |
| The people in charge of the preparation and transportation of the food I buy online comply with hygiene conditions and rules |  |  |  |  |  |
| Some digital food shopping platforms do not take people's health into account. |  |  |  |  |  |
| When shopping for e-food, I prefer places as close to my address as possible |  |  |  |  |  |
| I check whether the products marketed through e-food shopping channels include the necessary warnings. |  |  |  |  |  |
| I check whether the product labels marketed through e-food shopping channels contain the correct and necessary information |  |  |  |  |  |
| Necessary precautions are taken for products that spoil in a short period of time that I buy with e-food shopping. |  |  |  |  |  |
| Health hazards in e-food shopping are clearly and visibly communicated. |  |  |  |  |  |
| **Economic and Time Saving** | **1** | **2** | **3** | **4** | **5** |
| E-food shopping reduces unnecessary expenses such as transportation costs. |  |  |  |  |  |
| E-food shopping allows me to spend more time with myself and my family. |  |  |  |  |  |
| E-food shopping allows me to spend more time on personal affairs. |  |  |  |  |  |
| E-food shopping is more profitable than traditional shopping. |  |  |  |  |  |
